# Supplementary material
Source: publisher figshare collection journal article supplement (https://future-science-group.figshare.com/ndownloader/files/31072678)
Supplement: Supplementary file 1 [file 31072678]

**Supplementary Table 1.** The clinical characteristics of patients with ovarian cancer

| Characteristic | **Number of case** |
| --- | --- |
| **Age (years)** |  |
| ≤53 | 5 |
| ＞53 | 19 |
| **FIGO stage** |  |
| Ⅰ-Ⅱ | 7 |
| Ⅲ-Ⅳ | 17 |
| **Histological type** |  |
| Serous  Non-serous | 16  8 |
| **Metastasis** |  |
| Yes | 18 |
| No | 6 |
| **CA125** |  |
| ＜35 | 4 |
| ≥35 | 20 |

**Supplementary Table 2.** The top 10 upregulated genes in cisplatin-resistant cell line using microarray-based gene expression data GSE33482

| **Symble** | **FC (resistant/sensitive)** | **Log1.2FC** | **q** | **Log10q** |
| --- | --- | --- | --- | --- |
| INHBA | 1.610332 | 2.6131 | 0.0558 | 1.2535 |
| FAM9C | 1.558638 | 2.4342 | 0.0698 | 1.1561 |
| GALNT14 | 1.543442 | 2.3805 | 0.0468 | 1.3301 |
| PPIC | 1.509142 | 2.2572 | 3.3053E-11 | 10.4808 |
| COL12A1 | 1.490229 | 2.1881 | 0.0671 | 1.1729 |
| VEGFC | 1.490021 | 2.1873 | 0.0402 | 1.3956 |
| PROCR | 1.487586 | 2.1783 | 1.1923E-05 | 4.9236 |
| PDGFC | 1.461099 | 2.0798 | 0.07713 | 1.1128 |
| GNAI1 | 1.457474 | 2.0662 | 0.0074 | 2.1325 |
| TMEM98 | 1.454532 | 2.0551 | 2.9791E-05 | 4.5259 |
